# Supplementary material for: Investigating the metabolic capabilities of Mycobacterium tuberculosis H37Rv using the in silico strain iNJ661 and proposing alternative drug targets
Source: PubMed Central journal article supplement (PMC1925256; doi:10.1186/1752-0509-1-26), 2007-06-08

Robustness plots (calculating the objective function as a function of different flux uptake rates) were compared between *iNJ661* and *iJR904* (*in silico E. Coli*). The *in silico Mtb* strain was grown on Middlebrook 7H9 media conditions and the *in silico E. Coli* strain was grown on aerobic glucose conditions. The phosphate and sulfate uptake rates were varied and the resulting biomass production rates were observed. The slope of the robustness plots, provide an approximation to the sensitivity of the objective function on the respective flux. The slope for phosphate was approximately the same between *iNJ661* and *iJR904* ( $\sim 1$ ), however it was about four times greater for sulfate in *iNJ661* ( $\sim 16$ ) than *iJR904* ( $\sim 4$ ).

### *iNJ661* Robustness Plots

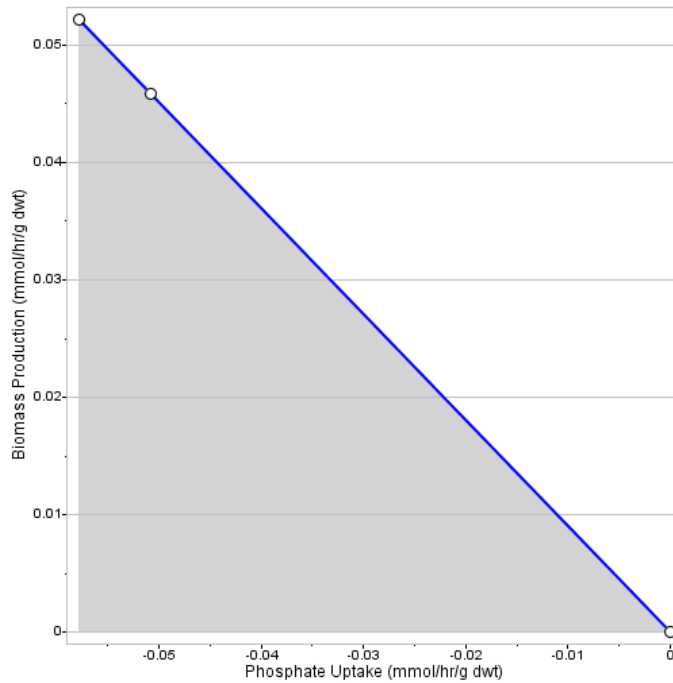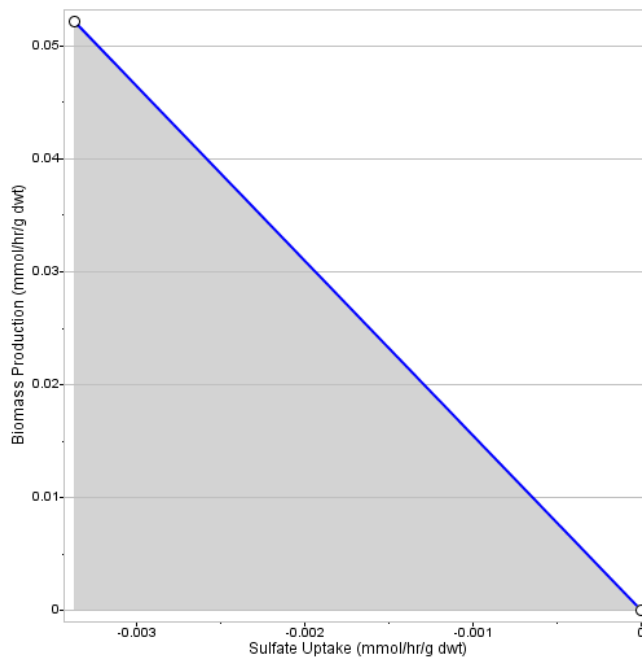

## *iJR904* Robustness Plots

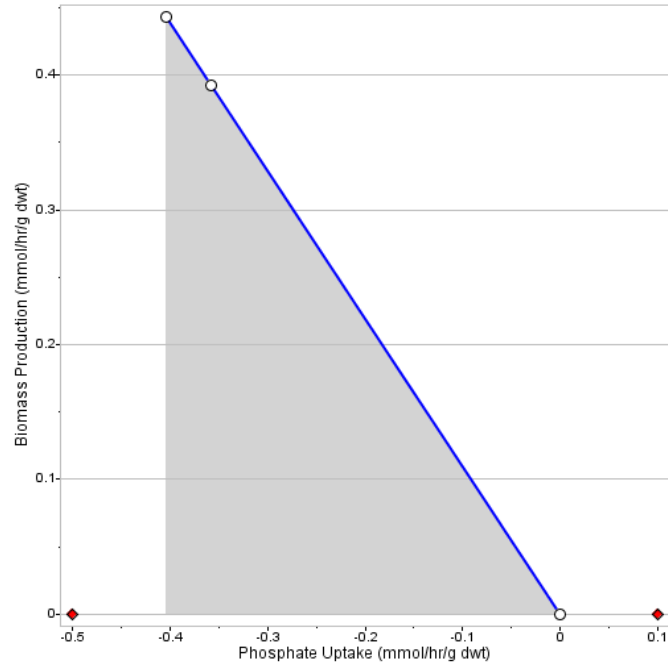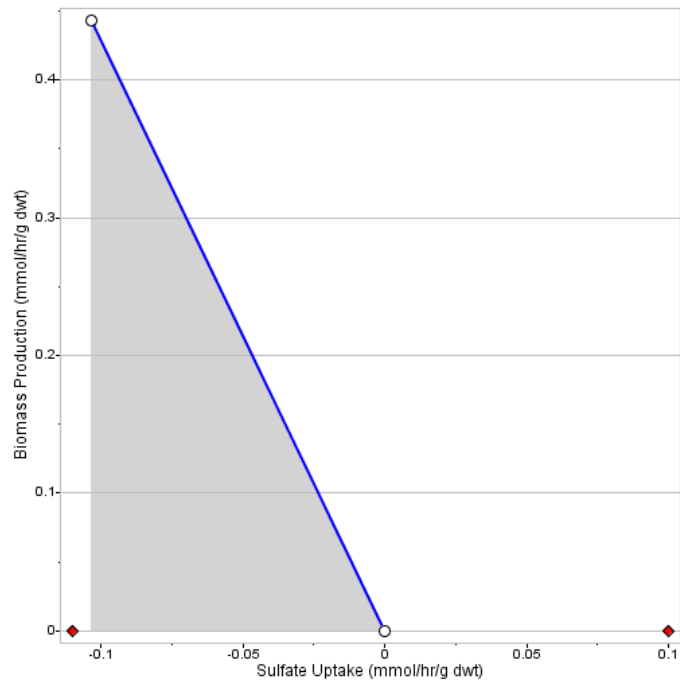

Supplement: 1752-0509-1-26-S7.pdf [file 1752-0509-1-26-S7.pdf]
